# Supplementary material for: The value of inpatient music therapy for gynae-oncology palliative care in Singapore
Source: Frontiers journal article supplement (doi:10.3389/fpsyt.2025.1577545), 2025-05-27
Supplement: Table_1.doc [file Table_1.doc]

The Value of Inpatient Music Therapy for Gynae-oncology Palliative Care in Singapore

**Table 1**. *Inclusion and Exclusion Criteria for Recruitment*

| **Inclusion Criteria** | **Exclusion Criteria** |
| --- | --- |
| Must be under the care of the Women's Palliative Care Service (WPCS) and referred for Art and/or Music Therapy | Patients with severe hearing and visual impairments |
| Participants must be able to converse in English or Mandarin skills | Patients who are unable to converse in English or Mandarin |
| Participants must be able to have at least one interview after their Art and/or Music Therapy session (within 5 working days). | Patients who are cognitively impaired |
| Participants must be aged 21 years or older | Patients who are under the age of 21 |
| Participants must have the ability to provide informed consent | Participants who are unable to provide informed consent |
