# Supplementary material for: The value of inpatient music therapy for gynae-oncology palliative care in Singapore
Source: Frontiers journal article supplement (doi:10.3389/fpsyt.2025.1577545), 2025-05-27
Supplement: Table_2.doc [file Table_2.doc]

The Value of Inpatient Music Therapy for Gynae-oncology Palliative Care in Singapore

**Table 2.** *Description of Music Therapy Interventions adapted from Allen & Clements-Cortés, 2013*.

| **Categories** | **Sub-categories** | **Description of intervention** |
| --- | --- | --- |
| **Receptive Methods** | **Receptive Music Therapy** | |
| Song Choice | Preferred songs of patient to be chosen and listened to |
| Music for Reminiscence | The retrieval of memories from music |
| Music for Relaxation | The use of music to achieve physical comfort |
| Song (Lyric) Discussion | Exploration of difficult emotions through the use of song lyrics/themes |
| Guided Imagery | Music and imagery for inner work |
| Somatic Listening | The use of musical tones and vibrations to address physiological functioning |
| **Active Methods** | **Improvisation Music Therapy** | |
| Active Improvisation | The patient is encouraged to make music to explore their emotions by playing instruments freely |
| Emphatic Improvisation | The music therapist improvises music in the moment that matches and brings compassion to the patient’s physical and mental state |
| Referential Improvisation | The music therapist provides a verbal prompt (i.e. a story, topic, symbol) for improvisation to be based on |
| **Re-creative Music Therapy** | |
| Vocal | Singing or vocalizing familiar songs? individually or as a group |
| Instrumental | Freely playing or learning an instrument individually or as a group |
| **Compositional Music Therapy** | |
| Song Composition | Writing of lyrics or instrumental parts for a new song |
| Song Stories | The telling of a client’s story through the writing of a new song |
| Musical Autobiographies/Musical life Reviews | Compilation of songs that tells their life story |
| Music Collages | Compilation of songs that represents who the person is |
