# Supplementary material for: The value of inpatient music therapy for gynae-oncology palliative care in Singapore
Source: Frontiers journal article supplement (doi:10.3389/fpsyt.2025.1577545), 2025-05-27
Supplement: Table_3.docx [file Table_3.docx]

The Value of Inpatient Music Therapy for Gynae-oncology Palliative Care in Singapore

**Table 3.** *Participant Demographics*

| **Participant Demographics** | **Frequency** |
| --- | --- |
| **Age** | |
| 25-34 | 1 |
| 35-44 | 3 |
| 45-54 | 2 |
| 55-64 | 3 |
| 65-74 | 6 |
| 75-84 | 1 |
| **Race** | |
| Chinese | 10 |
| Malay | 2 |
| Indian | 1 |
| Others | 3 |
| **Marital Status** | |
| Single | 5 |
| Married | 10 |
| Widowed | 1 |
| **Number of Children** | |
| No Children | 5 |
| 1 | 6 |
| 2 | 4 |
| 5 | 1 |
| **Religion** | |
| Buddhism | 6 |
| Christianity | 4 |
| Muslim | 3 |
| NA | 2 |
| Non Denomination | 1 |
| **Diagnosis** | |
| Uterine Cancer | 6 |
| Ovarian Cancer | 5 |
| Cervical Cancer | 5 |
