# Supplementary material for: The value of inpatient music therapy for gynae-oncology palliative care in Singapore
Source: Frontiers journal article supplement (doi:10.3389/fpsyt.2025.1577545), 2025-05-27
Supplement: Table_4.doc [file Table_4.doc]

The Value of Inpatient Music Therapy for Gynae-oncology Palliative Care in Singapore

**Table 4.** *Frequency of Music Therapy Methods and Interventions*

| **Music Therapy Interventions** | **Frequency** |
| --- | --- |
| **Receptive Music Therapy** | **42** |
| Song Choice | 19 |
| Music for Reminiscence | 10 |
| Music for Relaxation | 8 |
| Song (Lyric) Discussion | 5 |
| Guided Imagery | 0 |
| Somatic Listening | 0 |
| **Improvisation Music Therapy** | **4** |
| Active Improvisation | 2 |
| Emphatic Improvisation | 1 |
| Referential Improvisation | 1 |
| **Re-creative Music Therapy** | **3** |
| Vocal | 2 |
| Instrumental | 1 |
| **Compositional Music Therapy** | **3** |
| Song Composition | 2 |
| Song Stories | 1 |
| Musical Autobiographies/Musical life Reviews | 0 |
| Music Collages | 0 |
